# Supplementary material for: Chronic N-Acetyl-Cysteine Treatment Enhances the Expression of the Immediate Early Gene Nr4a1 in Response to an Acute Challenge in Male Rats: Comparison with the Antidepressant Venlafaxine
Source: MDPI journal article supplement (doi:10.3390/ijms24087321), 2023-04-15
Supplement: s1 [file s1]

|                                 | Two-way ANOVA         | F (dFn, dFd)      | P value |
|---------------------------------|-----------------------|-------------------|---------|
| <b>vHip</b>                     |                       |                   |         |
| <b>Arc</b>                      | treatment             | F (2, 33) = 11.2  | p=0.000 |
|                                 | challenge             | F (1,34) =49.5    | p=0.000 |
|                                 | treatment X challenge | F (2, 33) = 3.11  | p=0.059 |
| <b>Cfos</b>                     | treatment             | F (2, 31) = 13    | p=0.000 |
|                                 | challenge             | F (1, 32) = 173   | p=0.000 |
|                                 | treatment X challenge | F (2, 31) = 17.5  | p=0.000 |
| <b>Npas4</b>                    | treatment             | F (2, 33) = 4.98  | p=0.013 |
|                                 | challenge             | F (1, 34) =0.646  | p=0.421 |
|                                 | treatment X challenge | F (2, 33) = 2.76  | p=0.080 |
| <b>Zif268</b>                   | treatment             | F (2, 32) = 17.1  | p=0.000 |
|                                 | challenge             | F (1, 33) = 34.8  | p=0.000 |
|                                 | treatment X challenge | F (2, 32) = 2.67  | p=0.087 |
| <b>Gadd45<math>\beta</math></b> | treatment             | F (2, 33) = 16.7  | p=0.000 |
|                                 | challenge             | F (1, 34) = 45.2  | p=0.000 |
|                                 | treatment X challenge | F (2, 33) = 0.16  | p=0.845 |
| <b>Nr4a1</b>                    | treatment             | F (2, 34) = 16.9  | p=0.000 |
|                                 | challenge             | F (1, 35) = 22.1  | p=0.000 |
|                                 | treatment X challenge | F (2, 34) = 1.57  | p=0.224 |
| <b>dHip</b>                     |                       |                   |         |
| <b>Arc</b>                      | treatment             | F (2, 34) = 4.47  | p=0.020 |
|                                 | challenge             | F (1, 35) = 19    | p=0.000 |
|                                 | treatment X challenge | F (2, 34) = 2.99  | p=0.065 |
| <b>Cfos</b>                     | treatment             | F (2, 33) = 8.18  | p=0.001 |
|                                 | challenge             | F (1, 34) = 244   | p=0.000 |
|                                 | treatment X challenge | F (2, 33) = 4.97  | p=0.014 |
| <b>Npas4</b>                    | treatment             | F (2, 34) = 9.34  | p=0.000 |
|                                 | challenge             | F (1, 35) = 0.43  | p=0.516 |
|                                 | treatment X challenge | F (2, 34) = 2.98  | p=0.065 |
| <b>Zif268</b>                   | treatment             | F (2, 33) = 4.92  | p=0.014 |
|                                 | challenge             | F (1, 34) =5.21   | p=0.030 |
|                                 | treatment X challenge | F (2, 33) = 4.52  | p=0.019 |
| <b>Gadd45<math>\beta</math></b> | treatment             | F (2, 34) = 3.95  | p=0.030 |
|                                 | challenge             | F (1, 35) = 33.7  | p=0.000 |
|                                 | treatment X challenge | F (2, 34) = 4.12  | p=0.026 |
| <b>Nr4a1</b>                    | treatment             | F (2, 34) = 26.4  | p=0.000 |
|                                 | challenge             | F (1, 35) = 9.55  | p=0.004 |
|                                 | treatment X challenge | F (2, 34) =2.80   | p=0.076 |
| <b>Pfc</b>                      |                       |                   |         |
| <b>Arc</b>                      | treatment             | F (2, 34) = 3.22  | p=0.054 |
|                                 | challenge             | F (1, 35) = 210   | p=0.000 |
|                                 | treatment X challenge | F (2, 34) = 2.05  | p=0.146 |
| <b>Cfos</b>                     | treatment             | F (2, 33) = 1.77  | p=0.188 |
|                                 | challenge             | F (1, 34) = 235   | p=0.000 |
|                                 | treatment X challenge | F (2, 33) = 0.689 | p=0.509 |
| <b>Npas4</b>                    | treatment             | F (2, 33) = 6.27  | p=0.005 |
|                                 | challenge             | F (1, 34) = 23    | p=0.000 |
|                                 | treatment X challenge | F (2, 33) = 3.26  | p=0.052 |
| <b>Zif268</b>                   | treatment             | F (2, 33) = 47.2  | p=0.000 |
|                                 | challenge             | F (1, 34) = 155   | p=0.000 |
|                                 | treatment X challenge | F (2, 33) = 13.8  | p=0.000 |

|                                        |                       |                   |          |
|----------------------------------------|-----------------------|-------------------|----------|
| <b><i>Gadd45<math>\beta</math></i></b> | treatment             | F (2, 34) = 0.713 | p=0.498  |
|                                        | challenge             | F (1, 35) = 158   | p=0.000  |
|                                        | treatment X challenge | F (2, 34) = 2.13  | p=0.136  |
| <b><i>Nr4a1</i></b>                    | treatment             | F (2, 34) = 0.488 | p=0.618  |
|                                        | challenge             | F (1, 35) = 94.3  | p=0.000  |
|                                        | treatment X challenge | F (2, 34) = 1.80  | p=0.1833 |
| <b>Amy</b>                             |                       |                   |          |
| <b><i>Arc</i></b>                      | treatment             | F (2, 34) = 4.95  | p=0.013  |
|                                        | challenge             | F (1, 35) = 129   | p=0.000  |
|                                        | treatment X challenge | F (2, 34) = 7.18  | p=0.002  |
| <b><i>Cfos</i></b>                     | treatment             | F (2, 32) = 3.91  | p=0.031  |
|                                        | challenge             | F (1, 33) = 170   | p=0.000  |
|                                        | treatment X challenge | F (2, 32) = 6.77  | p=0.004  |
| <b><i>Npas4</i></b>                    | treatment             | F (2, 33) = 1.05  | p=0.364  |
|                                        | challenge             | F (1, 34) = 4.96  | p=0.033  |
|                                        | treatment X challenge | F (2, 33) = 2.82  | p=0.074  |
| <b><i>Zif268</i></b>                   | treatment             | F (2, 34) = 0.40  | p=0.667  |
|                                        | challenge             | F (1, 35) = 33.6  | p=0.000  |
|                                        | treatment X challenge | F (2, 34) = 0.38  | p=0.687  |
| <b><i>Gadd45<math>\beta</math></i></b> | treatment             | F (2, 34) = 1.80  | p=0.182  |
|                                        | challenge             | F (1, 35) = 186   | p=0.000  |
|                                        | treatment X challenge | F (2, 34) = 2.58  | p=0.092  |
| <b><i>Nr4a1</i></b>                    | treatment             | F (2, 33) = 2.58  | p=0.092  |
|                                        | challenge             | F (1, 34) = 93.7  | p=0.000  |
|                                        | treatment X challenge | F (2, 33) = 2.72  | p=0.828  |

**Table S1: Two-way ANOVA analysis of mRNA levels in the ventral hippocampus (vHip), dorsal hippocampus (dHip), prefrontal cortex (Pfc) and amygdala (Amy) of rats treated with VLX (10mg/kg) and NAC (300mg/kg) and exposed to 1 hour of acute restraint stress (challenge).**

| <b>IEGs<br/>Z-activation</b>    | <b>Two-way ANOVA</b>  | <b>F (dFn, dFd)</b> | <b>P value</b> |
|---------------------------------|-----------------------|---------------------|----------------|
| <b>Arc</b>                      | treatment             | F (2, 34) = 2.04    | p=0.1478       |
|                                 | challenge             | F (1, 35) = 183     | p=0.000        |
|                                 | treatment X challenge | F (2, 34) = 3.67    | p=0.037        |
| <b>c-Fos</b>                    | treatment             | F (2, 34) = 2.97    | p=0.066        |
|                                 | challenge             | F (1, 35) = 207     | p=0.000        |
|                                 | treatment X challenge | F (2, 34) = 3.71    | p=0.036        |
| <b>Npas4</b>                    | treatment             | F (2, 34) = 7.14    | p=0.002        |
|                                 | challenge             | F (1, 35) = 0.71    | p=0.404        |
|                                 | treatment X challenge | F (2, 34) = 3.82    | p=0.033        |
| <b>Zif268</b>                   | treatment             | F (2, 34) = 7.27    | p=0.002        |
|                                 | challenge             | F (1, 35) = 22.2    | p=0.000        |
|                                 | treatment X challenge | F (2, 34) = 1.29    | p=0.290        |
| <b>Gadd45<math>\beta</math></b> | treatment             | F (2, 34) = 6.02    | p=0.006        |
|                                 | challenge             | F (1, 35) = 147     | p=0.000        |
|                                 | treatment X challenge | F (2, 34) = 1.27    | p=0.294        |
| <b>Nr4a1</b>                    | treatment             | F (2, 33) = 25.4    | p=0.000        |
|                                 | challenge             | F (1, 34) = 109     | p=0.000        |
|                                 | treatment X challenge | F (2, 33) = 2.59    | p=0.091        |

**Table S2: Two-way ANOVA analysis of the Z activation IEGs in the four brain regions of rats treated with VLX (10mg/kg) and NAC (300mg/kg) and exposed to 1 hour of acute restraint stress (challenge).**
